# Supplementary material for: Identification of therapeutic targets for osteosarcoma by integrating single-cell RNA sequencing and network pharmacology
Source: PubMed Central journal article supplement (PMC9853455; doi:10.3389/fphar.2022.1098800), 2023-01-06
Supplement: Table1.pdf [file Table1.pdf]

## *Supplementary Material*

# Identification of therapeutic targets for osteosarcoma by integrating single-cell RNA sequencing and network pharmacology

**Yan Wang, Di Qin, Yiyao Gao, Yunxin Zhang, Yao Liu, Lihong Huang\***

\* **Correspondence:** Lihong Huang: lhhuang@jlu.edu.cn

Table S1. The primer sequences for qRT-PCR assay.

| Gene           | Primer sequences (5'-3') | Length (bp) |
|----------------|--------------------------|-------------|
| CD4 forward    | TGTACAGCTTCCCAGAAGAAGAG  | 264         |
| CD4 reverse    | GTTGGCAGTCAATCCGAACAC    |             |
| RUNX2 forward  | TGGTACTGTCATGGCGGGTA     | 101         |
| RUNX2 reverse  | TCTCAGATCGTTGAACCTTGCTA  |             |
| OMD forward    | AGGCTGTGTCAGTGAATGCTT    | 82          |
| OMD reverse    | TGGGATAGTCTTGAGTTTGCGAT  |             |
| COL9A3 forward | GTGGATGGTCTGACTGGACG     | 287         |
| COL9A3 reverse | GGGCAGATACTTGGGCACTG     |             |
| JUN forward    | GCGGACCTTATGGCTACAGT     | 191         |
| JUN reverse    | CCCGTTGCTGGACTGGATTA     |             |

GAPDH forward GGAGCGAGATCCCTCCAAAAT 197

GAPDH reverse GGCTGTTGTCATACTTCTCATGG

---
